# Supplementary material for: Importance of porous structure and synergistic effect on the catalytic oxidation activities over hierarchical Mn–Ni composite oxides
Source: Royal Society of Chemistry journal article supplement (doi:10.1039/c5cy01119a), 2015-10-15
Supplement: c5cy01119a1.pdf [file c5cy01119a1.pdf]

## Supporting Information

### Importance of porous structure and synergistic effect on the catalytic oxidation activities over hierarchical Mn-Ni composite oxides

Wenxiang Tang <sup>a,b</sup>, Yuzhou Deng <sup>a</sup>, Wenhui Li <sup>a</sup>, Jiaqi Li <sup>a</sup>, Gang Liu <sup>a</sup>,  
Shuangde Li <sup>a</sup>, Xiaofeng Wu <sup>a\*</sup>, Yunfa Chen <sup>a\*</sup>

Table S1. The comparative experimental results of catalytic performance towards benzene oxidation between the as-prepared MNCO catalyst and other catalysts in reported literatures.

| Catalysts                                                       | Surface area<br>(m <sup>2</sup> g <sup>-1</sup> ) | VOC type | VOC conc.<br>(ppm) | SV<br>(mL g <sub>cat</sub> <sup>-1</sup> h <sup>-1</sup> ) | T <sub>90%</sub><br>(°C) | Ref. no.  |
|-----------------------------------------------------------------|---------------------------------------------------|----------|--------------------|------------------------------------------------------------|--------------------------|-----------|
| Co/CeO <sub>2</sub> /SBA-15                                     | 529                                               | Benzene  | 1000               | 39,600                                                     | 265                      | 24        |
| Ce <sub>1-x</sub> Zr <sub>x</sub> O <sub>2</sub>                | 133.7                                             | Benzene  | 2000               | 155,000                                                    | 350                      | 25        |
| LaMnO <sub>3</sub> ,<br>LaCoO <sub>3</sub> , LaFeO <sub>3</sub> | 4.8~17.2                                          | Benzene  | 1000               | 60,000                                                     | 350                      | 26        |
| Cu-Mn-Ce-O                                                      | 109                                               | Benzene  | 1000               | 60,000                                                     | 250                      | 27        |
| Mn-Cu-O                                                         | 266                                               | Benzene  | 1000               | 60,000                                                     | 234                      | 20        |
| Pd/AlCe-PILC                                                    | 343.6~377.4                                       | Benzene  | 160                | 25,000                                                     | 240                      | 9         |
| Pd/La-ZSM-5                                                     | 261                                               | Benzene  | 1000               | 20,000                                                     | 260                      | 28        |
| Mn-Ni-O                                                         | 201                                               | Benzene  | 1000               | 120,000                                                    | 232                      | This work |

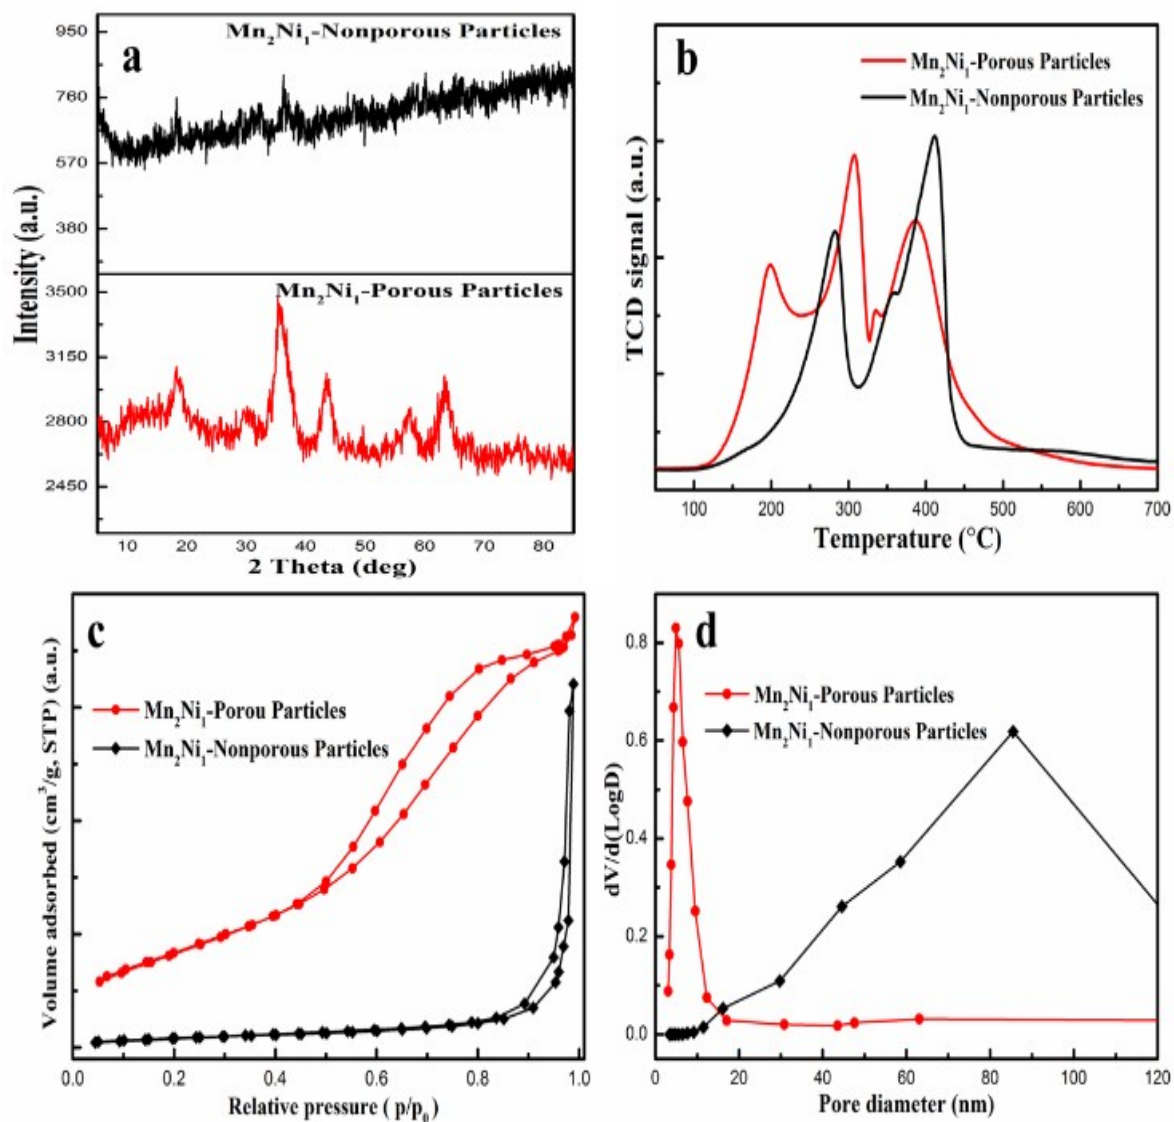

Fig. S1. Comparison between general nonporous and oxalate-derived porous MnCO particles. (a) XRD patterns, (b) H<sub>2</sub>-TPR profiles, (c) N<sub>2</sub> adsorption-desorption isotherms, (d) BJH pore-size distribution.

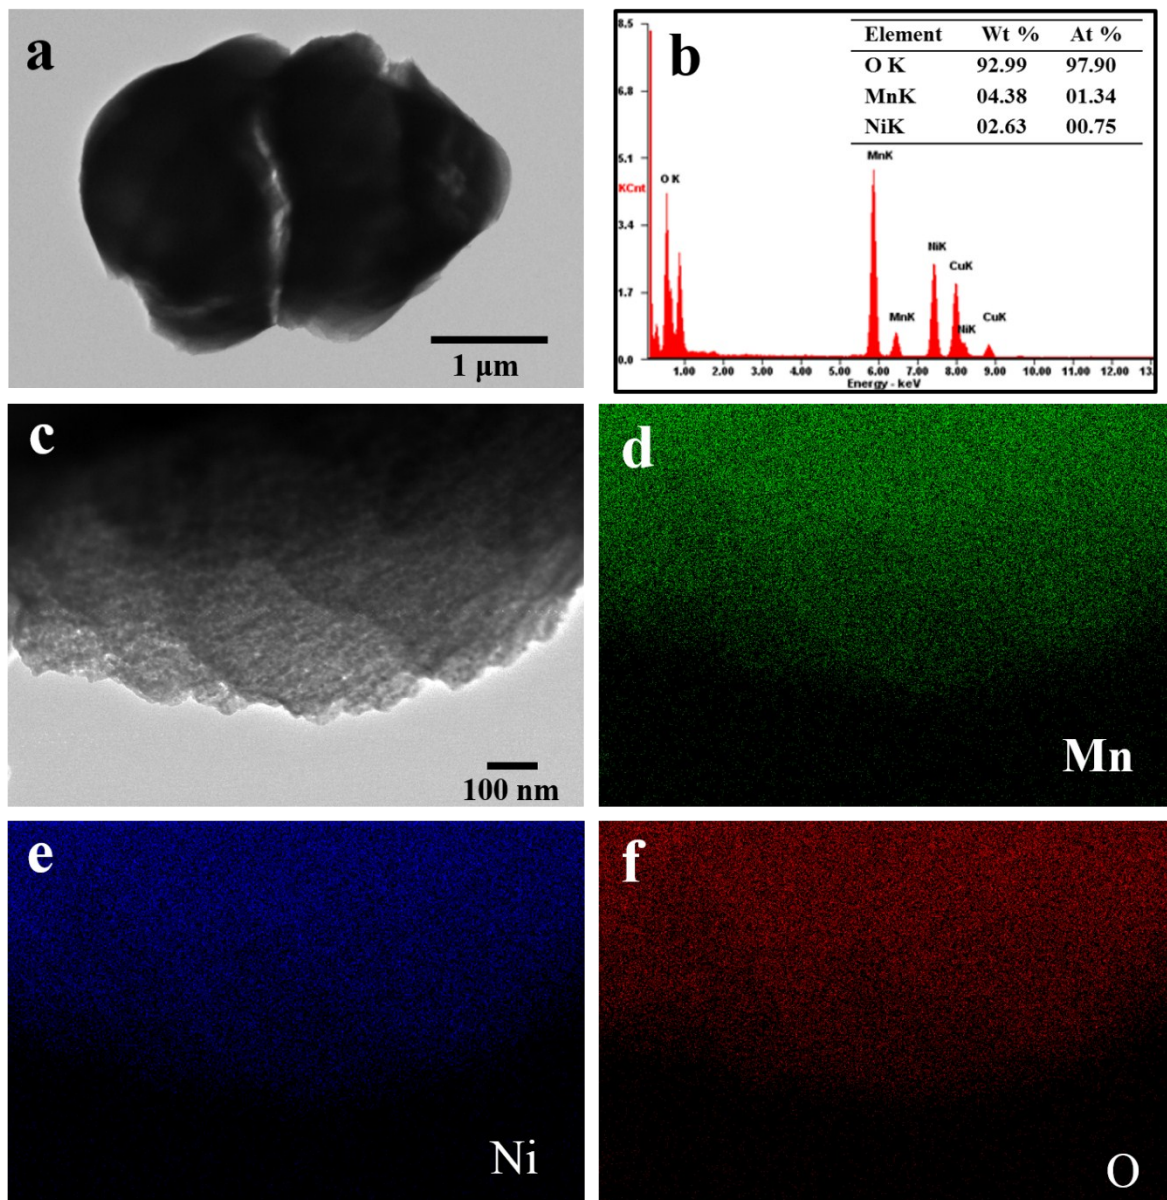

Fig. S2. TEM images (a, c), EDX-data (b) and elemental mapping images (d, e, f) of the oxalate-derived porous MnCO ( $Mn_2Ni_1$ ) particles.
